# Supplementary material
Source: publisher site journal article supplement (https://www.dovepress.com/article/512410)
Supplement: Supplementary file 1 [file get_supplementary_file.php]

**Supplymentary material**

**Table S1** Age-Adjusted Charlson Comorbidity Index (ACCI) Scores and Their Distribution Characteristics

| **Comorbidities** | **Scores** | **N=252, n (%)** |
| --- | --- | --- |
| Myocardial infarction | 1 | 0(0.0) |
| Congestive heart failure | 1 | 12(4.76) |
| Peripheral vascular disease | 1 | 24(9.52) |
| Cerebrovascular disease | 1 | 20(7.93) |
| Dementia | 1 | 3(1.19) |
| Chronic pulmonary disease | 1 | 45(17.86) |
| Connective tissue disease | 1 | 6(2.38) |
| Ulcer disease | 1 | 72(28.57) |
| Mild liver disease | 1 | 89(35.32) |
| Hypertension | 1 | 65(25.79) |
| Diabetes | 1 | 32(12.70) |
| Moderate or severe renal disease | 2 | 2(0.79) |
| Diabetes with end-organ disease 2 / Solid tumor | 2 | 12(4.76) |
| Hemiplegia | 2 | 1(0.40) |
| Leukemia | 2 | 0(0.0) |
| Malignant lymphoma | 2 | 0(0.0) |
| Moderate / Severe liver disease | 3 | 44(17.46) |
| Metastatic solid tumor | 6 | 0(0.0) |
| Acquired immunodeficiency syndrome | 6 | 0(0.0) |
| Assigned weights for age |  |  |
| <50 | 0 | 0(0.0) |
| 50-59 | 1 | 0(0.0) |
| 60-69 | 2 | 129(51.19) |
| 70-79 | 3 | 113(44.84) |
| ≥80 | 4 | 10(3.97) |

**Table S2** Incidence and Distribution of Postoperative Complications

| **Complication** | **N=252, (%)** |
| --- | --- |
| Electrolyte disturbance | 85（33.73） |
| Infection | 62(24.60) |
| Ascites | 38(15.08) |
| Biliary fistula | 32(12.70) |
| Hemorrhage | 15(5.95) |
| Thrombosis | 5(1.98) |
| Malnutrition | 81(32.14) |
| Gastroparesis | 35(13.89) |
| Anemia | 46(18.25) |
| Hepatic encephalopathy | 5(1.98) |
| Liver failure | 3(1.19) |
| Renal failure | 4(1.59) |
| Death | 1(0.40) |

**Table S3** Comparative Analysis of Inter-Model Performance Score

| Model | Training group | | | | | Validation group | | | | |
| --- | --- | --- | --- | --- | --- | --- | --- | --- | --- | --- |
| C-index | 1y-BS | 2y-BS | 3y-BS | IBS | C-index | 1y-BS | 2y-BS | 3y-BS | IBS |
| LASSO+RSF | 0.869 | 0.189 | 0.207 | 0.258 | 0.218 | 0.818 | 0.159 | 0.170 | 0.298 | 0.209 |
| RSF | 0.869 | 0.435 | 0.243 | 0.342 | 0.340 | 0.818 | 0.375 | 0.417 | 0.425 | 0.406 |
| RSF+  ObliqueRSF | 0.868 | 0.269 | 0.291 | 0.317 | 0.292 | 0.811 | 0.358 | 0.391 | 0.460 | 0.403 |
| RSF+GBM | 0.831 | 0.275 | 0.283 | 0.306 | 0.288 | 0.844 | 0.257 | 0.288 | 0.365 | 0.303 |
| COXBoost+  RSF | 0.852 | 0.187 | 0.315 | 0.342 | 0.281 | 0.819 | 0.157 | 0.232 | 0.274 | 0.221 |

**Table S4** Feature distribution by age groups in the validation group

| Variables | Total (n = 75) | Age<75 (n = 13) | Age≤75 (n = 62) | *P* |
| --- | --- | --- | --- | --- |
|
| LOS, M (Q₁, Q₃) | 16.0 (14.0, 17.0) | 16.0 (14.0, 17.0) | 16.0(14.0, 17.0) | 0.994 |
| HC, M (Q₁, Q₃) | 95451.0(81316.7, 115845.5) | 98474.0 (79996.0, 134426.0) | 95174.0(81735.3, 106382.8) | 0.649 |
| PFS, M (Q₁, Q₃) | 23.0 (6.5, 36.0) | 8.0 (2.0, 24.0) | 24.0 (9.0, 37.0) | 0.044 |
| OS, M (Q₁, Q₃) | 30.0 (8.0, 44.0) | 11.0 (4.0, 32.0) | 32.5 (12.0, 44.8) | 0.114 |
| ACCI, M (Q₁, Q₃) | 4.0 (3.0, 5.0) | 6.0 (5.0, 7.0) | 4.0 (3.0, 5.0) | <0.001 |
| OT, M (Q₁, Q₃) | 195.0 (157.5, 241.0) | 232.0 (160.0, 260.0) | 189.5(149.8,233.0) | 0.157 |
| IBL, M (Q₁, Q₃) | 195.0 (100.0, 287.5) | 165.0 (150.0, 200.0) | 197.5 (100.0, 293.8) | 0.827 |
| CD Grade, n (%) |  |  |  | 0.033 |
| <3 | 43 (57.33) | 4 (30.77) | 39 (62.90) |  |
| ≥3 | 32 (42.67) | 9 (69.23) | 23 (37.10) |  |
| LI, n (%) |  |  |  | 0.055 |
| No | 49 (65.33) | 5 (38.46) | 44 (70.97) |  |
| Yes | 26 (34.67) | 8 (61.54) | 18 (29.03) |  |
| Tumor capsule, n (%) |  |  |  | 0.206 |
| No | 40 (53.33) | 9 (69.23) | 31 (50.00) |  |
| Yes | 35 (46.67) | 4 (30.77) | 31 (50.00) |  |
| MVI, n (%) |  |  |  | 0.394 |
| 0 | 40 (53.33) | 5 (38.46) | 35 (56.45) |  |
| 1 | 25 (33.33) | 5 (38.46) | 20 (32.26) |  |
| 2 | 10 (13.33) | 3 (23.08) | 7 (11.29) |  |

**Abbreviations:** Z: Mann-Whitney test, χ²: Chi-square test; M: Median, Q₁: 1st Quartile, Q₃: 3rd Quartile; LOS: Length of stay; HC: Hospital costs; PFS: Progression-free survival; OS: Overall survival; ACCI: Age-adjusted Charlson comorbidity index; OT: Operative time; IBL: Intraoperative blood loss; CD grade: Clavien-Dindo grade; LI: Lymphatic invasion; MVI: Microvascular invasion

###

### Table S5 Feature distribution by surgical approaches in the validation group

| Variables | Total  (n = 75) | Laparoscopic  (n = 28) | Open  (n = 47) | *P* |
| --- | --- | --- | --- | --- |
|
| OT, M (Q₁, Q₃) | 195.0 (157.5, 241.0) | 220.0 (188.0, 255.8) | 180.0 (145.0, 230.0) | 0.011 |
| IBL, M (Q₁, Q₃) | 195.0 (100.0, 287.5) | 200.0 (100.0, 262.5) | 180.0 (150.0, 287.5) | 0.434 |
| LOS, M (Q₁, Q₃) | 16.0 (14.0, 17.0) | 14.5 (13.0, 16.3) | 16.0 (15.0, 17.0) | 0.011 |
| HC, M (Q₁, Q₃) | 95451.0(81316.7, 115845.5) | 96962.5(84760.8, 106332.3) | 94074.3(80190.0, 121119.5) | 0.944 |
| PFS, M (Q₁, Q₃) | 23.0 (6.5, 36.0) | 31.0 (14.0, 38.0) | 17.0 (6.0, 30.0) | 0.084 |
| OS, M (Q₁, Q₃) | 30.0 (8.0, 44.0) | 34.0 (17.8, 45.8) | 20.00 (7.5, 41.5) | 0.208 |
| CD Grade, n (%) |  |  |  | 0.017 |
| <3 | 43 (57.33) | 21 (75.00) | 22 (46.81) |  |
| ≥3 | 32 (42.67) | 7 (25.00) | 25 (53.19) |  |

**Abbreviations:** Z: Mann-Whitney test, χ²: Chi-square test; M: Median, Q₁: 1st Quartile, Q₃: 3rd Quartile; LOS: Length of stay; HC: Hospital costs; PFS: Progression-free survival; OS: Overall survival; OT: Operative time; IBL: Intraoperative blood loss; CD grade: Clavien-Dindo grade
